# Supplementary material for: Synthesis and transition metal coordination chemistry of a novel hexadentate bispidine ligand
Source: Royal Society of Chemistry journal article supplement (doi:10.1039/c4dt03262d), 2014-11-19
Supplement: c4dt03262d1.pdf [file c4dt03262d1.pdf]

## **Synthesis and transition metal coordination chemistry of a novel hexadentate bispidine ligand**

*Peter Comba,\* Henning Rudolf and Hubert Wadepohl*

Universität Heidelberg, Anorganisch-Chemisches Institut, INF 270,  
D-69120 Heidelberg, Germany

## **Electronic Supporting Information**

Correspondence:

e-mail: [peter.comba@aci.uni-heidelberg.de](mailto:peter.comba@aci.uni-heidelberg.de)

Fax: +49-6221-546617



**Table S1.** Redox potentials of copper-bispidine complexes used for the correlation of with Cu<sup>II</sup> complex stabilities in Figure S1 (references refer to the main text).<sup>4, 28-30, 32</sup>

| Ligand <sup>a</sup>             | E(Cu <sup>I/II</sup> ) [mV] (MeCN vs. Fc) | logK(Cu <sup>II</sup> ) |
|---------------------------------|-------------------------------------------|-------------------------|
| L <sup>1</sup>                  | -598                                      | 16.56(5)                |
| Me <sub>2</sub> -L <sup>1</sup> | -270                                      | 9.60(7)                 |
| L <sup>2</sup>                  | -776                                      | 18.31(12)               |
| L <sup>2'</sup>                 | -661                                      | 15.66(3)                |
| L <sup>3</sup>                  | -745                                      | 16.28(10)               |
| L                               | -651                                      | 16.0                    |
| L <sup>OH</sup>                 | -671                                      | 16.3                    |

<sup>a</sup> abbreviations: see Figure S1 and Chart 1 in the manuscript

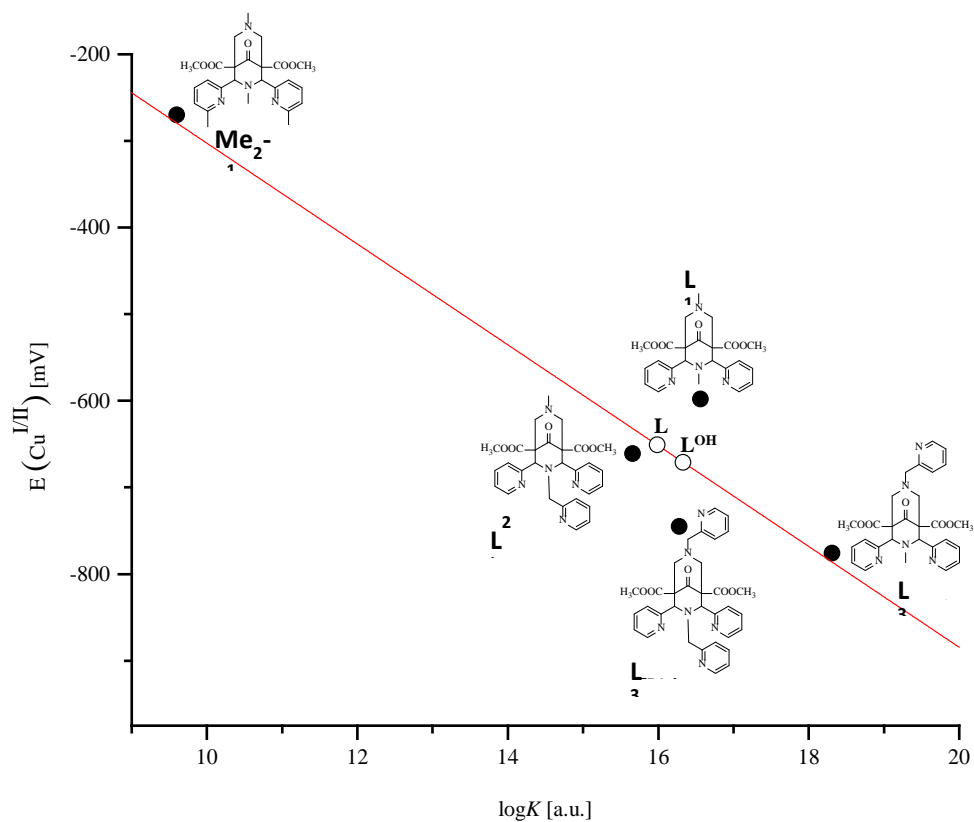

**Figure S1.** Plot of the redox potentials as a function of the Cu<sup>II</sup> complex stability for the determination of the stability constants of ligands L and L<sup>OH</sup> (data from Table S1).<sup>4, 28-30, 32</sup>

**Table S2.** Structural analysis of the manganese complex (see Table 5 and Figure 4); best plane for the pentagonal bipyramidal structure (distances in Å):

| molecule            | 1         | 2         |
|---------------------|-----------|-----------|
| RMSD (plane)        | 0.376     | 0.378     |
| distance from plane |           |           |
| N3                  | 0.572(1)  | 0.574(1)  |
| py1                 | -0.492(1) | -0.354(1) |
| py2                 | -0.347(1) | -0.470(1) |
| py3                 | 0.060(1)  | 0.054(1)  |
| py4                 | 0.186(1)  | 0.194(1)  |

**Table S3.** Details of the crystal structure determinations of  $[\text{Cu}^{\text{II}}(\text{L})]^{2+}$ ,  $[\text{Cu}^{\text{II}}(\text{L}^{\text{OH}})]^{2+}$ ,  $[\text{Fe}^{\text{II}}(\text{L})\text{OHMe}]^{2+}$ ,  $[\text{Fe}^{\text{III}}(\text{L})\text{OMe}]^{2+}$ ,  $[\text{Fe}^{\text{II}}(\text{L}^{\text{OH}})\text{Cl}]^+$ , and  $[\text{Mn}^{\text{II}}(\text{L})\text{Cl}]^+$

|                                       | $[\text{Cu}^{\text{II}}(\text{L})](\text{BF}_4)_2$                           | $[\text{Cu}^{\text{II}}(\text{L}^{\text{OH}})](\text{BF}_4)_2 \cdot 2\text{H}_2\text{O}$ | $[\text{Fe}^{\text{II}}(\text{L})\text{OHMe}](\text{BF}_4)_2 \cdot \text{OEt}_2$ | $[\text{Fe}^{\text{III}}(\text{L})\text{OMe}](\text{ClO}_4)_2 \cdot \text{H}_2\text{O} \cdot \text{NCMe}$ | $[\text{Fe}^{\text{II}}(\text{L}^{\text{OH}})\text{Cl}]\text{Cl} \cdot \text{solv}$ | $2[\text{Mn}^{\text{II}}(\text{L})\text{Cl}][\text{MnCl}_4] \cdot \text{MeO} \cdot \text{solv}$ |
|---------------------------------------|------------------------------------------------------------------------------|------------------------------------------------------------------------------------------|----------------------------------------------------------------------------------|-----------------------------------------------------------------------------------------------------------|-------------------------------------------------------------------------------------|-------------------------------------------------------------------------------------------------|
| formula                               | $\text{C}_{33.57}\text{H}_{34.13}\text{B}_2\text{CuF}_8\text{N}_6\text{O}_6$ | $\text{C}_{33}\text{H}_{38}\text{B}_2\text{CuF}_8\text{N}_6\text{O}_7$                   | $\text{C}_{38.7}\text{H}_{48.7}\text{B}_2\text{F}_8\text{FeN}_6\text{O}_{7.7}$   | $\text{C}_{36}\text{H}_{42}\text{Cl}_2\text{FeN}_7\text{O}_{16}$                                          | $\text{C}_{33}\text{H}_{34}\text{Cl}_2\text{FeN}_6\text{O}_5$                       | $\text{C}_{34.5}\text{H}_{38}\text{Cl}_3\text{Mn}_{1.5}\text{N}_6\text{O}_{6.5}$                |
| $M_r$                                 | 854.75                                                                       | 867.85                                                                                   | 950.18                                                                           | 955.51                                                                                                    | 720.38                                                                              | 829.47                                                                                          |
| crystal system                        | monoclinic                                                                   | monoclinic                                                                               | monoclinic                                                                       | triclinic                                                                                                 | triclinic                                                                           | monoclinic                                                                                      |
| space group                           | $P 2_1/c$                                                                    | $P 2_1/c$                                                                                | $P 2_1/n$                                                                        | $P -1$                                                                                                    | $P -1$                                                                              | $P2_1/a$                                                                                        |
| $a / \text{\AA}$                      | 20.74985(19)                                                                 | 20.7553(3)                                                                               | 10.538(5)                                                                        | 13.353(6)                                                                                                 | 8.40726(19)                                                                         | 20.546(2)                                                                                       |
| $b / \text{\AA}$                      | 10.42825(8)                                                                  | 10.30900(12)                                                                             | 15.040(7)                                                                        | 13.488(6)                                                                                                 | 14.6959(3)                                                                          | 15.8473(17)                                                                                     |
| $c / \text{\AA}$                      | 17.69608(16)                                                                 | 17.8036(2)                                                                               | 27.068(14)                                                                       | 13.681(6)                                                                                                 | 15.2169(4)                                                                          | 23.647(2)                                                                                       |
| $\alpha / ^\circ$                     |                                                                              |                                                                                          |                                                                                  | 61.283(7)                                                                                                 | 79.632(2)                                                                           |                                                                                                 |
| $\beta / ^\circ$                      | 102.4417(9)                                                                  | 103.2779(13)                                                                             | 99.311(8)                                                                        | 69.065(14)                                                                                                | 84.430(2)                                                                           | 104.361(12)                                                                                     |
| $\gamma / ^\circ$                     |                                                                              |                                                                                          |                                                                                  | 68.674(11)                                                                                                | 76.8063(18)                                                                         |                                                                                                 |
| $V / \text{\AA}^3$                    | 3739.23(6)                                                                   | 3707.55(8)                                                                               | 4233(3)                                                                          | 1962.1(15)                                                                                                | 1797.48(8)                                                                          | 7458.9(14)                                                                                      |
| $Z$                                   | 4                                                                            | 4                                                                                        | 4                                                                                | 2                                                                                                         | 2                                                                                   | 8                                                                                               |
| $F_{000}$                             | 1746                                                                         | 1780                                                                                     | 1969                                                                             | 990                                                                                                       | 747                                                                                 | 3492                                                                                            |
| $d_c / \text{Mg} \cdot \text{m}^{-3}$ | 1.518                                                                        | 1.555                                                                                    | 1.491                                                                            | 1.617                                                                                                     | 1.331                                                                               | 1.477                                                                                           |
| X-radiation, $\lambda / \text{\AA}$   | Cu- $K\alpha$ , 1.5418                                                       | Mo- $K\alpha$ , 0.71073                                                                  | Mo- $K\alpha$ , 0.71073                                                          | Mo- $K\alpha$ , 0.71073                                                                                   | Mo- $K\alpha$ , 0.71073                                                             | Mo- $K\alpha$ , 0.71073                                                                         |
| $\mu / \text{mm}^{-1}$                | 1.652                                                                        | 0.685                                                                                    | 1.491                                                                            | 0.606                                                                                                     | 0.613                                                                               | 0.784                                                                                           |
| max., min. transmission factors       | 0.957, 0.785                                                                 | 0.965, 0.912                                                                             | 0.7462, 0.6976                                                                   | 0.7464, 0.7022                                                                                            | 1.0000, 0.7692                                                                      | 0.898, 0.587                                                                                    |
| data collect. temperat. /K            | 110(1)                                                                       | 110(1)                                                                                   | 100(2)                                                                           | 100(2)                                                                                                    | 110(1)                                                                              | 200(2)                                                                                          |
| $\theta$ range / $^\circ$             | 4.8 to 70.8                                                                  | 3.2 to 25.7                                                                              | 1.5 to 31.0                                                                      | 1.7 to 32.5                                                                                               | 3.3 to 29.9                                                                         | 2.6 to 30.5                                                                                     |
| index ranges (indep. set) $h,k,l$     | -25 ... 25, -12 ... 12, -                                                    | -25 ... 25, -12 ... 12, -                                                                | -15 ... 15, -21 ... 21, -                                                        | -19 ... 20, -20 ... 20, -                                                                                 | -11 ... 11, -20 ... 20, -                                                           | -29 ... 29, -22 ... 22, -                                                                       |

|                                                        | $[\text{Cu}^{\text{II}}(\text{L})](\text{BF}_4)_2$ | $[\text{Cu}^{\text{II}}(\text{L}^{\text{OH}})](\text{BF}_4)_2 \cdot 2\text{H}_2\text{O}$ | $[\text{Fe}^{\text{II}}(\text{L})\text{OHMe}](\text{BF}_4)_2 \cdot \text{OEt}_2$ | $[\text{Fe}^{\text{III}}(\text{L})\text{OMe}](\text{ClO}_4)_2 \cdot \text{H}_2\text{O} \cdot \text{NCMe}$ | $[\text{Fe}^{\text{II}}(\text{L}^{\text{OH}})\text{Cl}]\text{Cl} \cdot \text{solv}$ | $2[\text{Mn}^{\text{II}}(\text{L})\text{Cl}][\text{MnCl}_4] \cdot \text{MeO} \cdot \text{solv}$ |
|--------------------------------------------------------|----------------------------------------------------|------------------------------------------------------------------------------------------|----------------------------------------------------------------------------------|-----------------------------------------------------------------------------------------------------------|-------------------------------------------------------------------------------------|-------------------------------------------------------------------------------------------------|
|                                                        | 21 ... 21                                          | 21 ... 21                                                                                | 39 ... 39                                                                        | 20 ... 20                                                                                                 | 21 ... 21                                                                           | 33 ... 32                                                                                       |
| reflections measured                                   | 92804                                              | 70356                                                                                    | 103429                                                                           | 50130                                                                                                     | 97442                                                                               | 88584                                                                                           |
| unique $[R_{\text{int}}]$                              | 7169 [0.0403]                                      | 7025 [0.0649]                                                                            | 13502 [0.0516]                                                                   | 13127 [0.0449]                                                                                            | 9872 [0.0727]                                                                       | 22313 [0.0947]                                                                                  |
| observed $[I \geq 2\sigma(I)]$                         | 6735                                               | 5859                                                                                     | 10336                                                                            | 10051                                                                                                     | 8736                                                                                | 11153                                                                                           |
| parameters refined                                     | 528                                                | 524                                                                                      | 613                                                                              | 571                                                                                                       | 449                                                                                 | 940                                                                                             |
| GooF on $F^2$                                          | 1.050                                              | 1.042                                                                                    | 1.043                                                                            | 1.033                                                                                                     | 1.210                                                                               | 0.795                                                                                           |
| $R$ indices $[F > 4\sigma(F)]$ $R(F)$ , $wR(F^2)$      | 0.0803, 0.2317                                     | 0.0434, 0.0991                                                                           | 0.0589, 0.1608                                                                   | 0.0429, 0.1030                                                                                            | 0.0659, 0.1307                                                                      | 0.0473, 0.1073                                                                                  |
| $R$ indices (all data) $R(F)$ , $wR(F^2)$              | 0.0830, 0.2343                                     | 0.0556, 0.1055                                                                           | 0.0809, 0.1757                                                                   | 0.0646, 0.1152                                                                                            | 0.0775, 0.1346                                                                      | 0.1034, 0.1190                                                                                  |
| Difference density: max, min /e $\cdot\text{\AA}^{-3}$ | 2.137, -1.166                                      | 0.908, -0.773                                                                            | 1.504, -0.788                                                                    | 0.893, -0.688                                                                                             | 0.486, -0.503                                                                       | 1.51, -0.99                                                                                     |

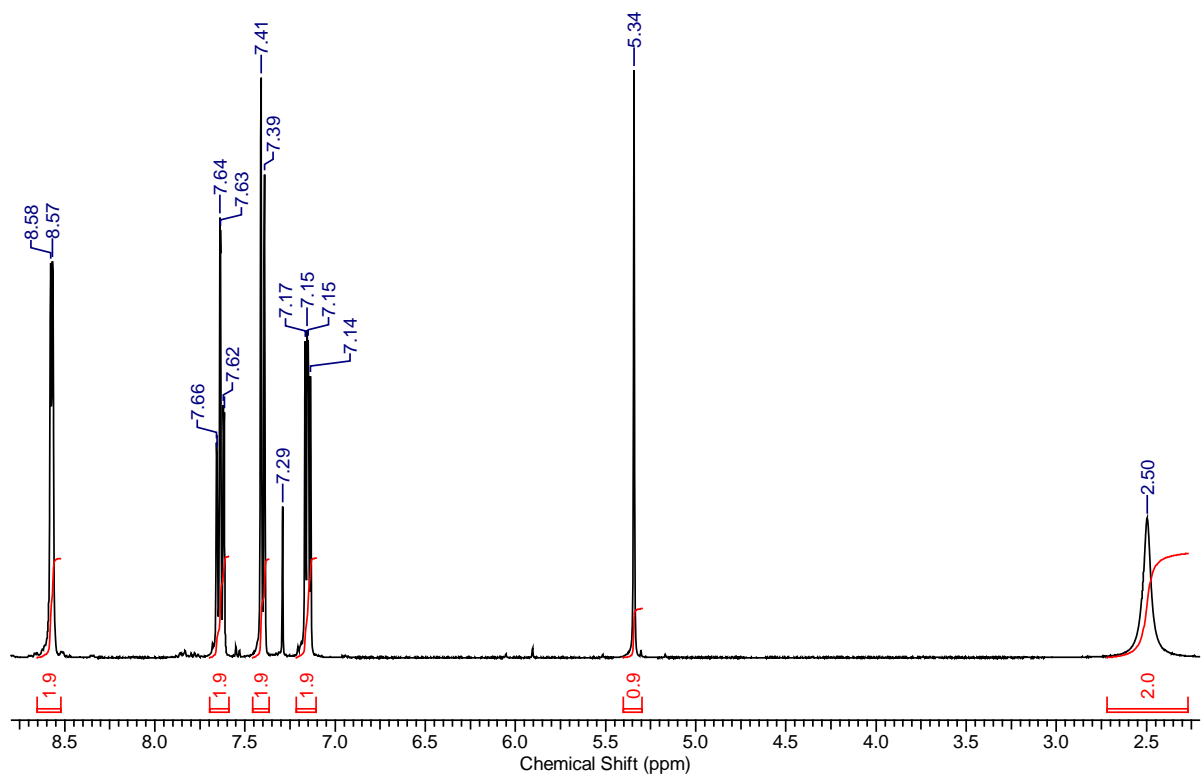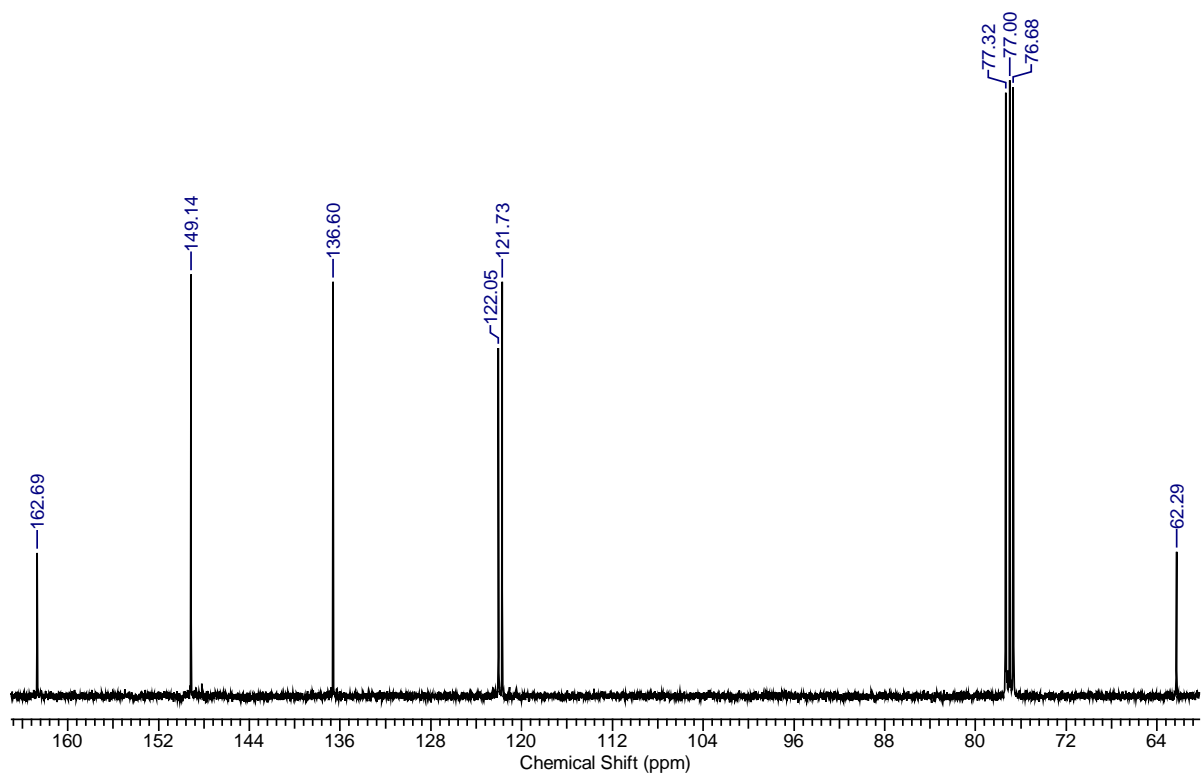

Figure S2: NMR Spectra of Di(2-pyridyl)methylamine

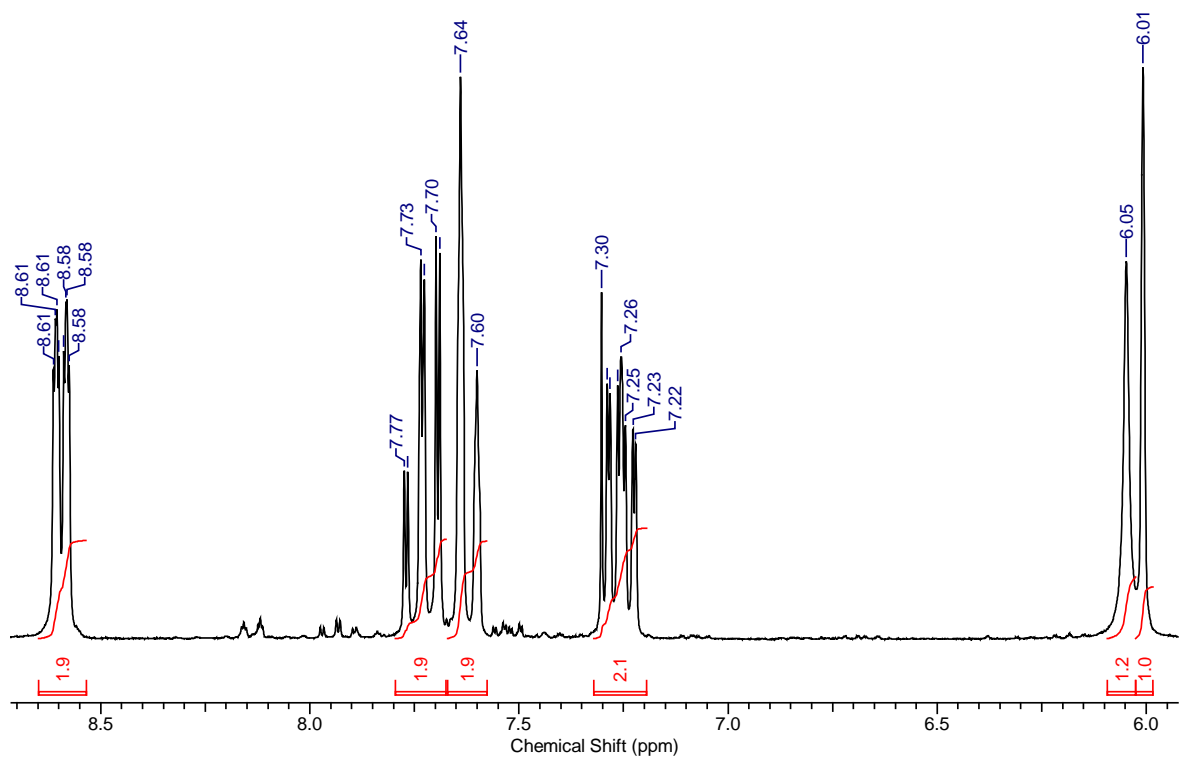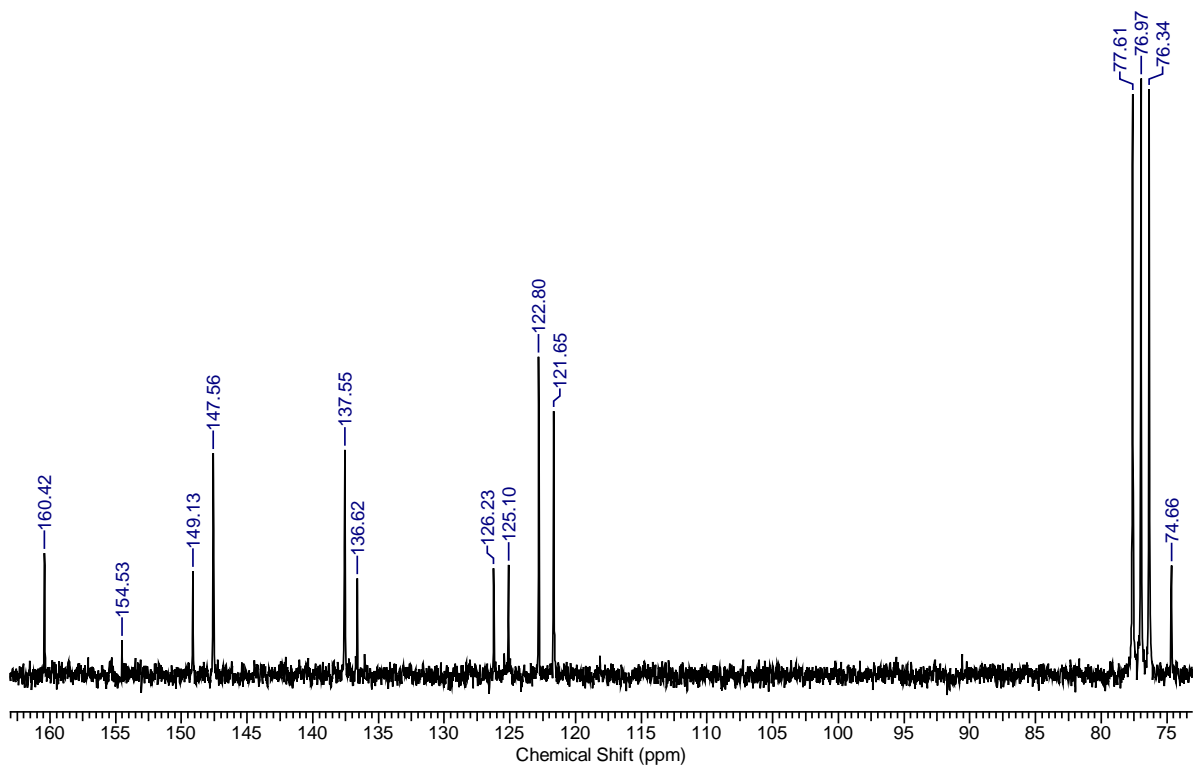

Figure S3: NMR Spectra of Di(2-pyridyl)methanol



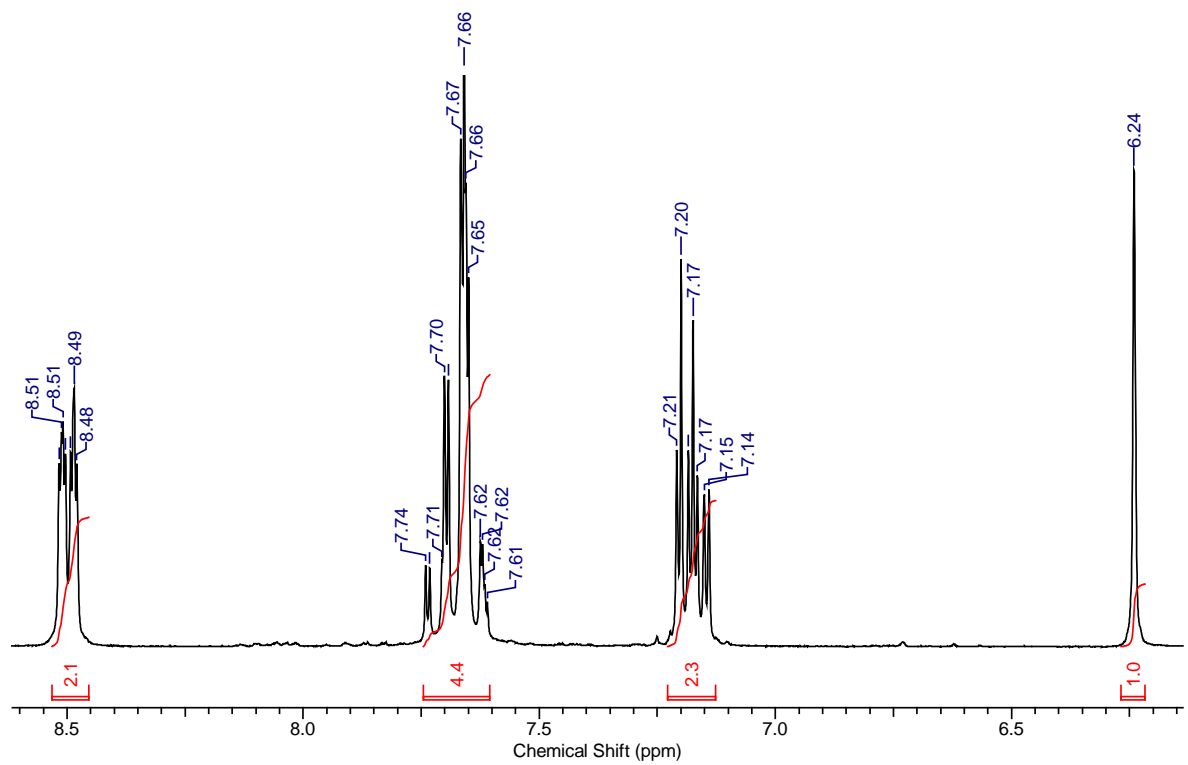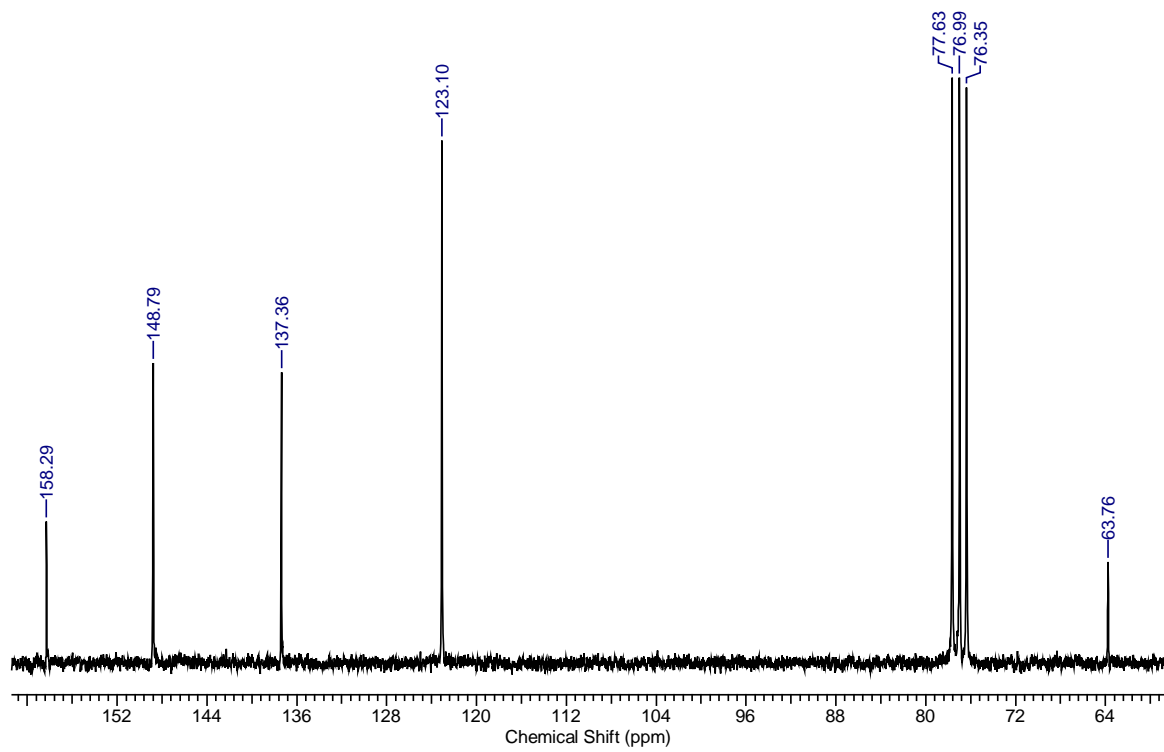

Figure S4: NMR Spectra of Di(2-pyridyl)methylchloride

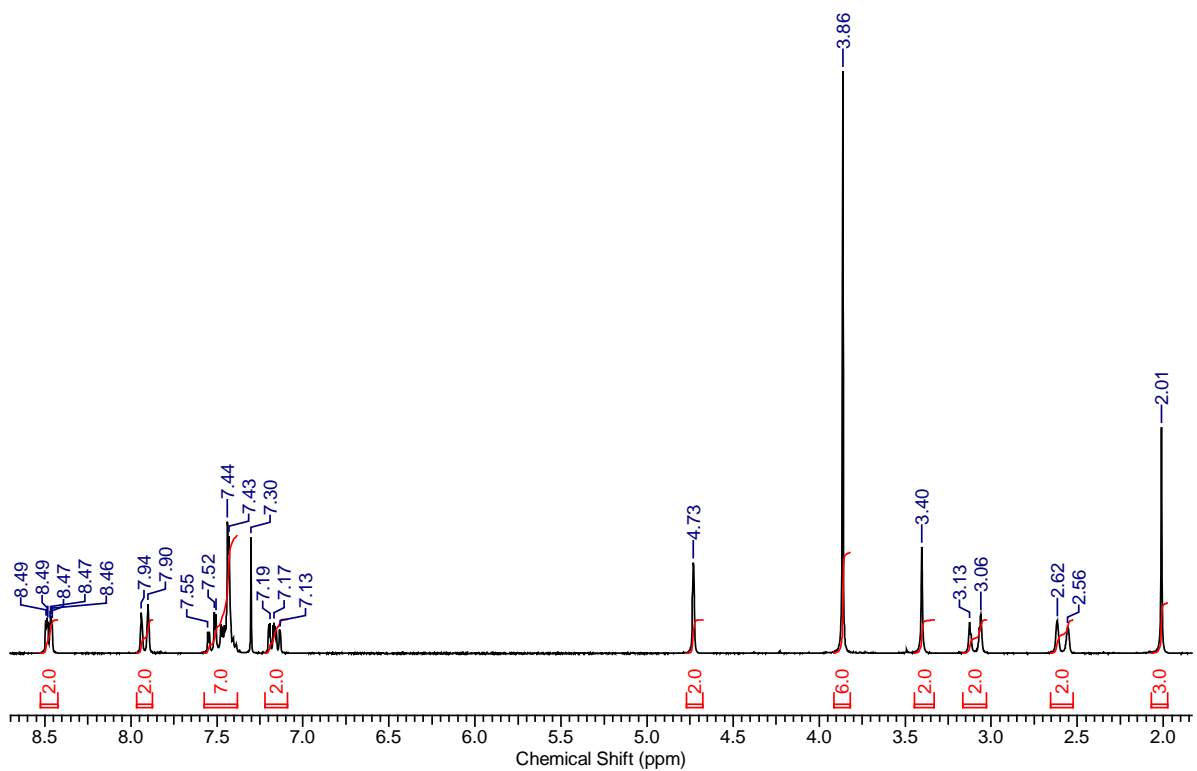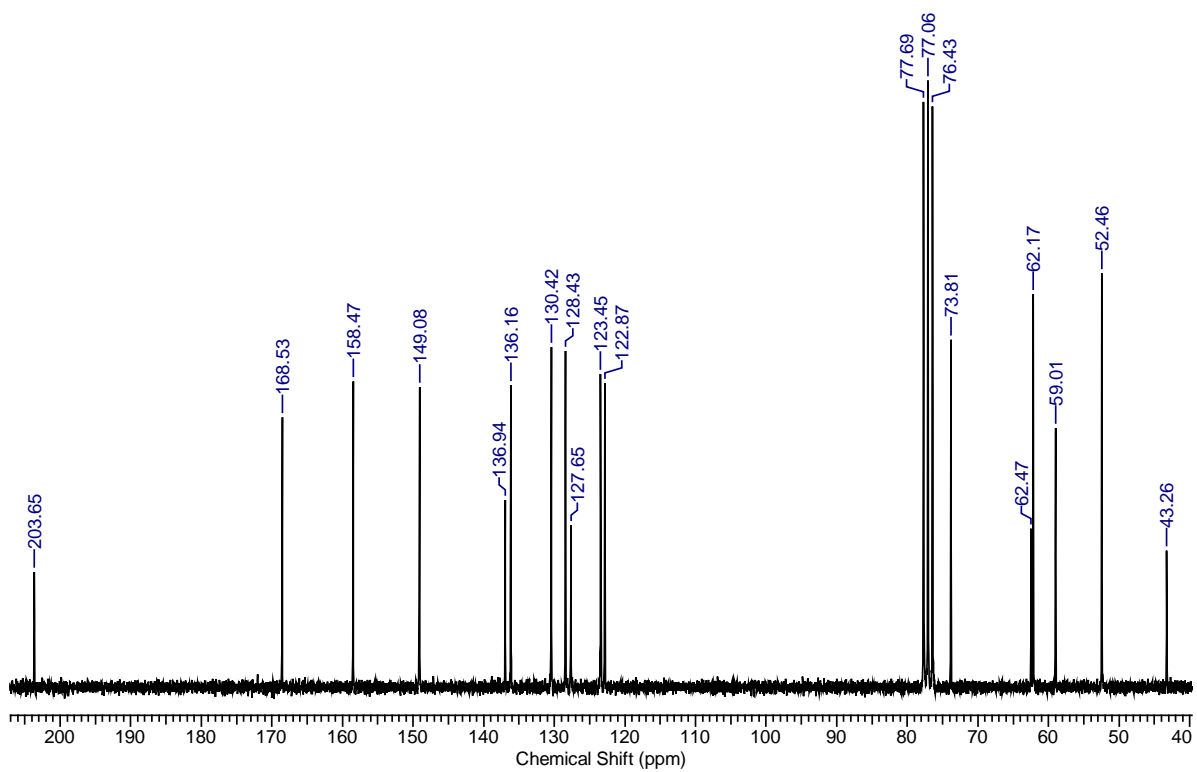

**Figure S5:** NMR Spectra of Dimethyl-(7-benzyl-3-methyl-9-oxo-2,4-bis(2-pyridyl)-3,7-diazabicyclo[3.3.1]nonane)-1,5-dicarboxylate

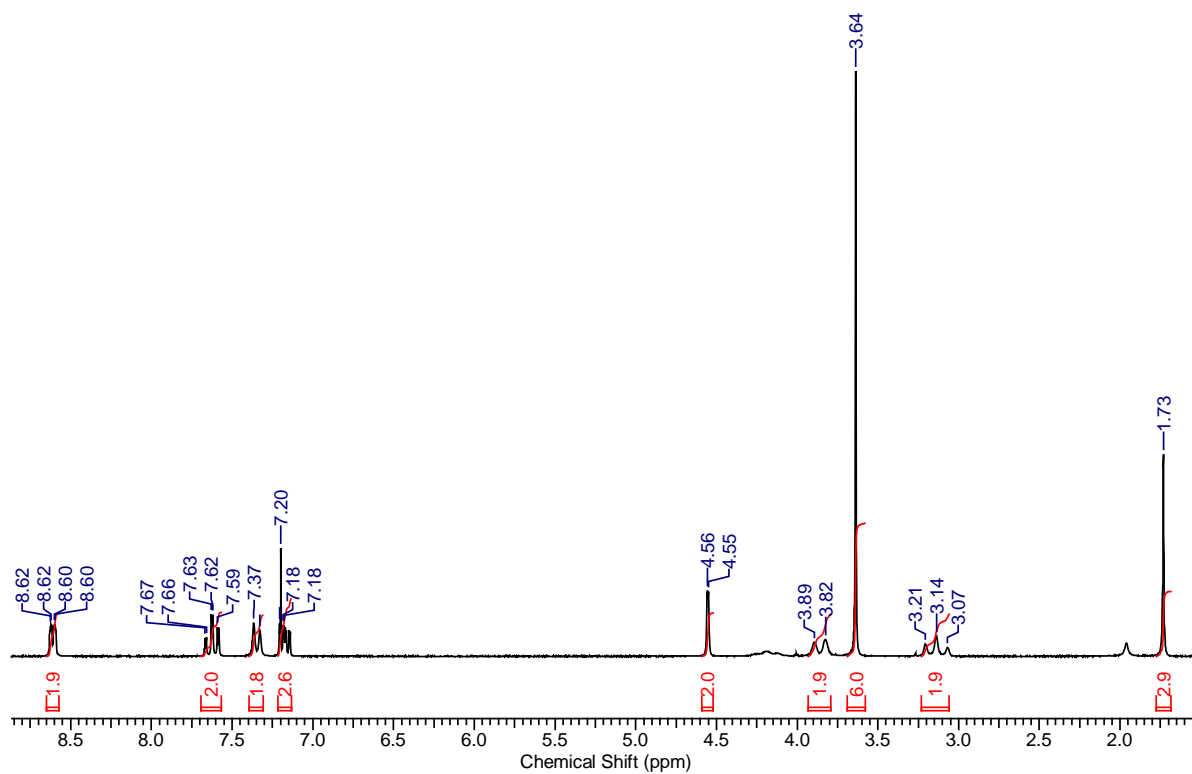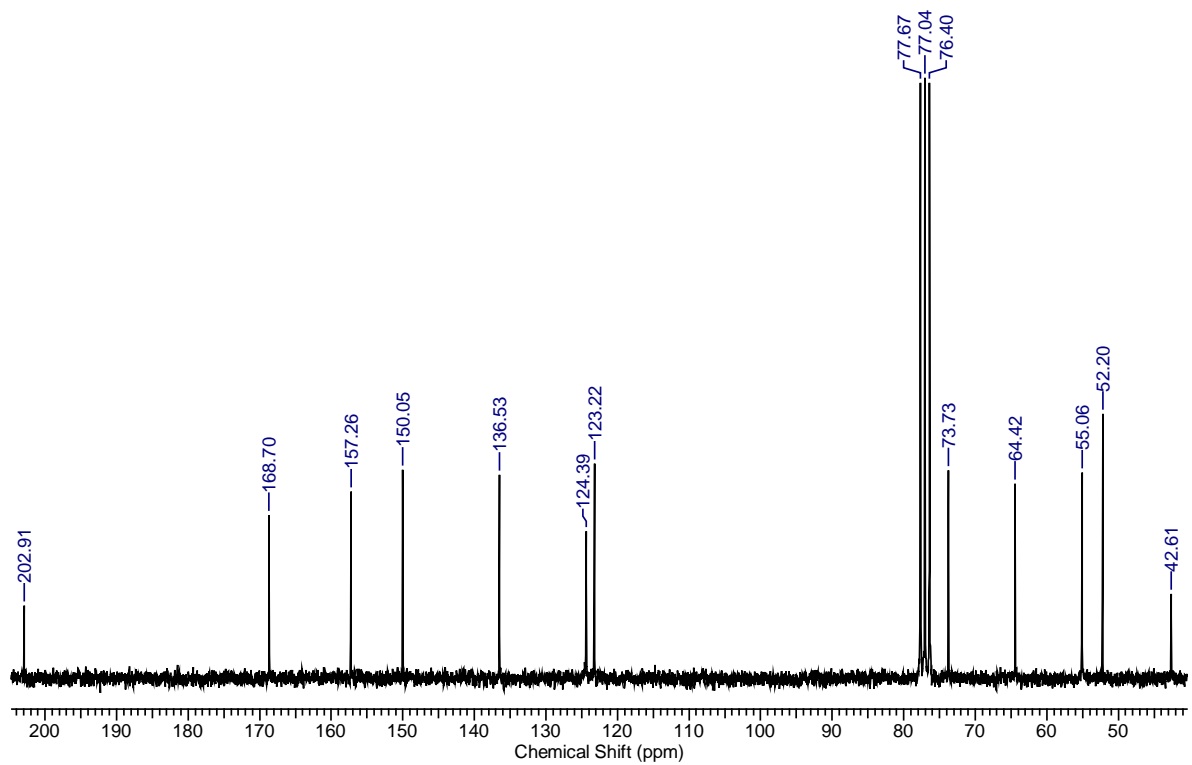

**Figure S6:** NMR Spectra of Dimethyl-(3-methyl-9-oxo-2,4-bis(2-pyridyl)-3,7-diazabicyclo[3.3.1]nonane)-1,5-dicarboxylate

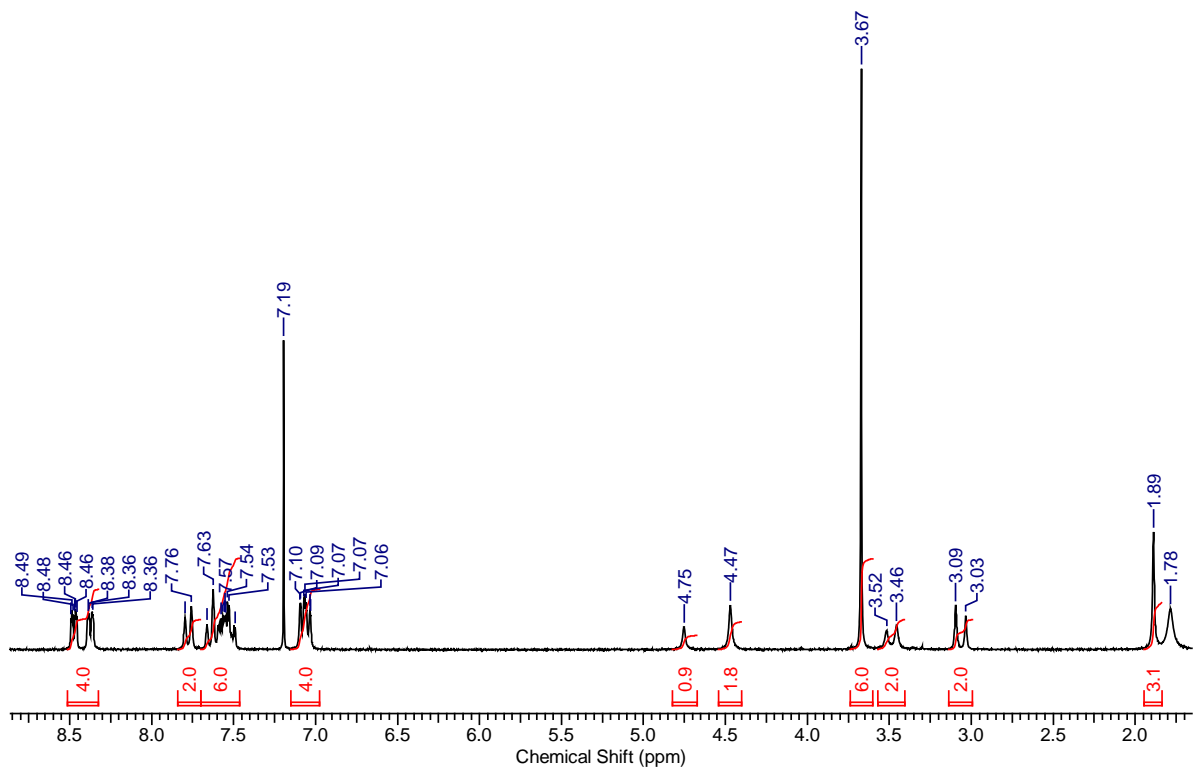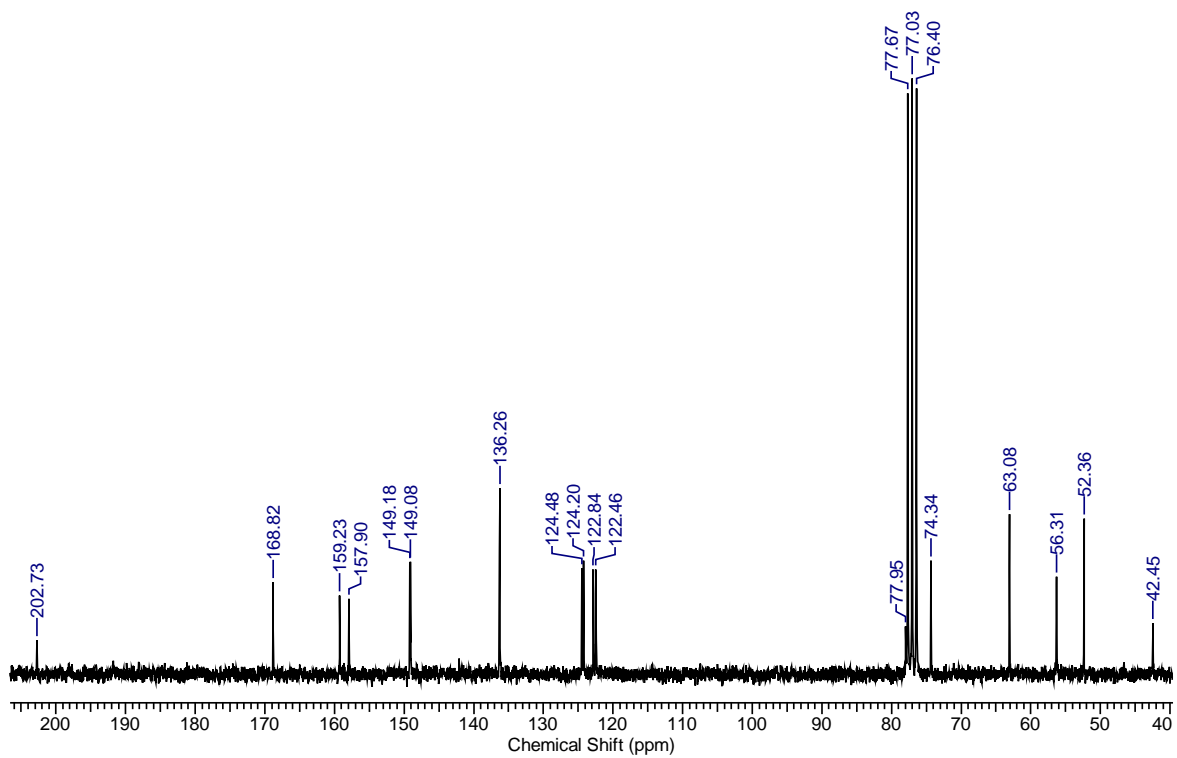

**Figure S7:** NMR Spectra of Dimethyl-(3-methyl-7-bis(2-pyridyl)methyl-9-oxo-2,4-bis(2-pyridyl)-3,7-diazabicyclo[3.3.1]nonane)-1,5-dicarboxylate

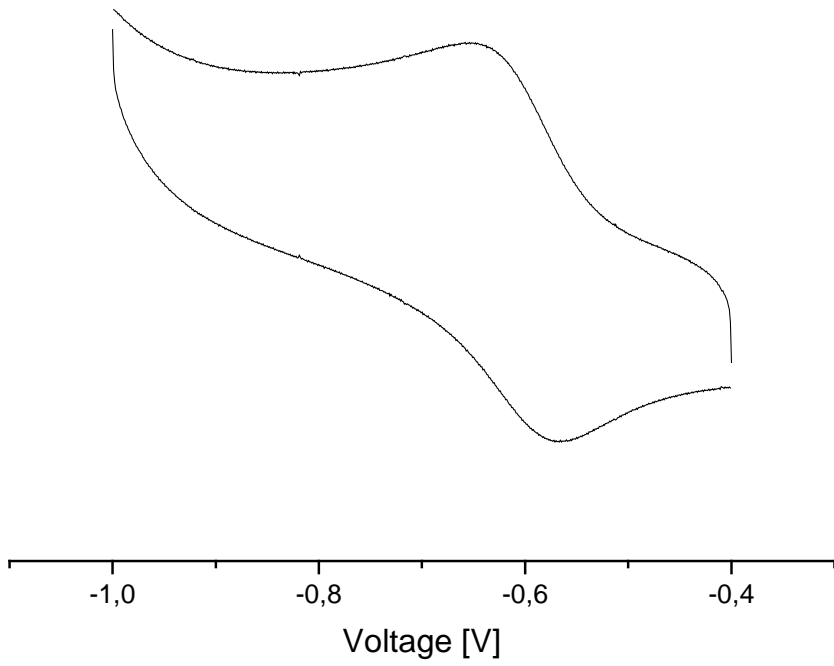

**Figure S8:** Cyclovoltammogramm of  $[\text{Cu}(\text{L})](\text{BF}_4)_2$  in acetonitrile with 0.1M  $(\text{Bu}_4\text{N})\text{PF}_6$  as supporting electrolyte vs.  $\text{Ag}/\text{AgNO}_3$

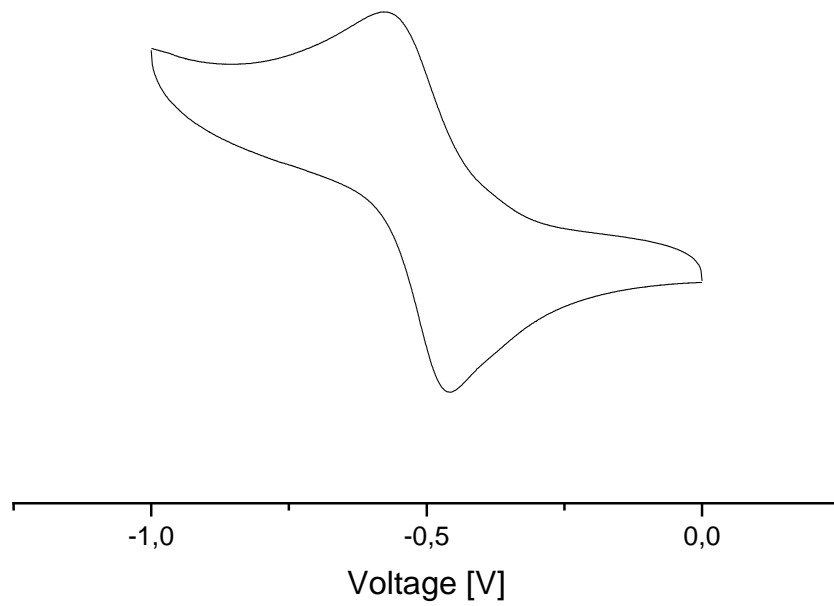

**Figure S9:** Cyclovoltammogramm of  $[\text{Cu}(\text{L})](\text{BF}_4)_2$  in water with 3M  $\text{NaCl}$  as supporting electrolyte vs.  $\text{Ag}/\text{AgCl}$

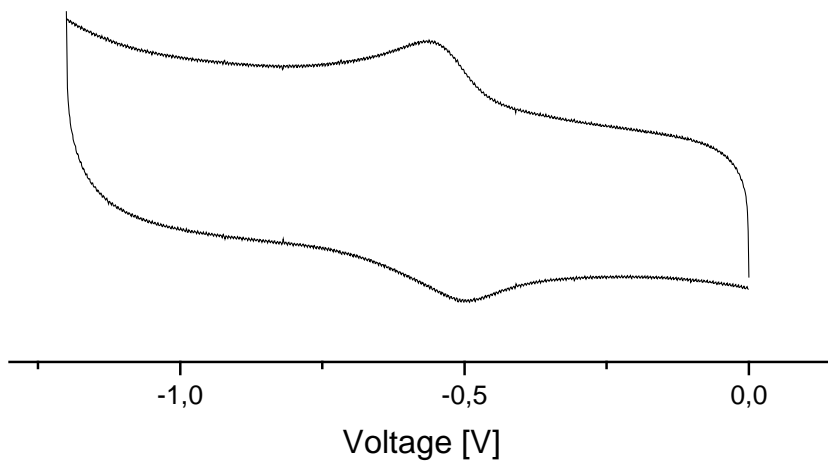

**Figure S10:** Cyclovoltammogramm of  $[\text{Cu}(\text{L}^{\text{OH}})](\text{BF}_4)_2$  in acetonitrile with 0.1M  $(\text{Bu}_4\text{N})\text{PF}_6$  as supporting electrolyte vs.  $\text{Ag}/\text{AgNO}_3$

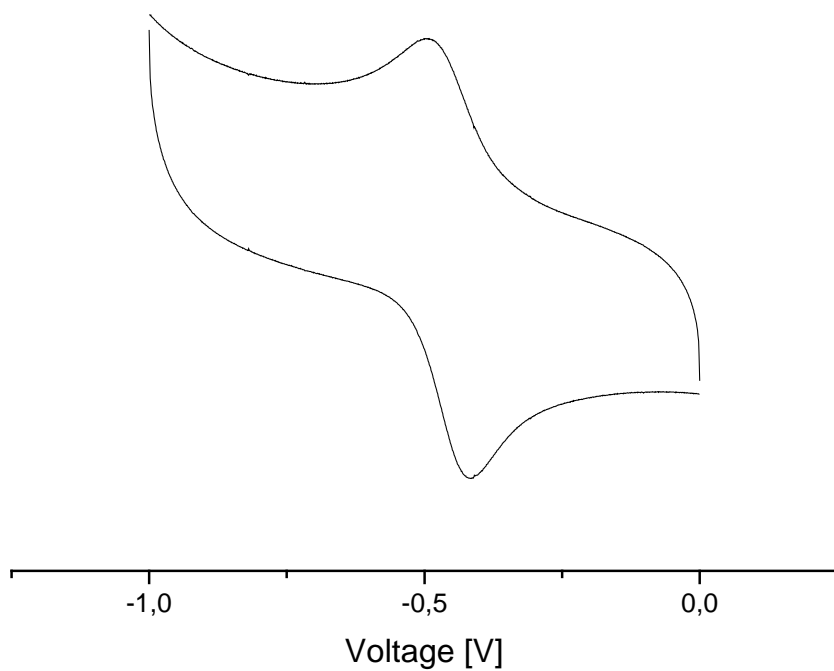

**Figure S11:** Cyclovoltammogramm of  $[\text{Cu}(\text{L}^{\text{OH}})](\text{BF}_4)_2$  in water with 3M  $\text{NaCl}$  as supporting electrolyte vs.  $\text{Ag}/\text{AgCl}$

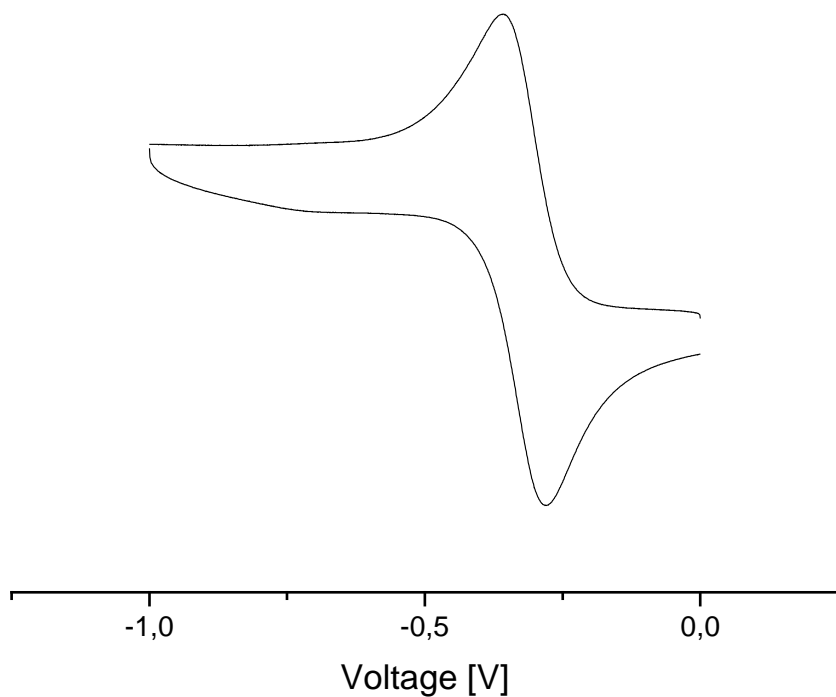

**Figure S12:** Cyclovoltammogramm of  $[\text{Cu}(\text{L})](\text{ClO}_4)_2$  in acetonitrile with 0.1M  $(\text{Bu}_4\text{N})\text{PF}_6$  as supporting electrolyte vs.  $\text{Ag}/\text{AgNO}_3$

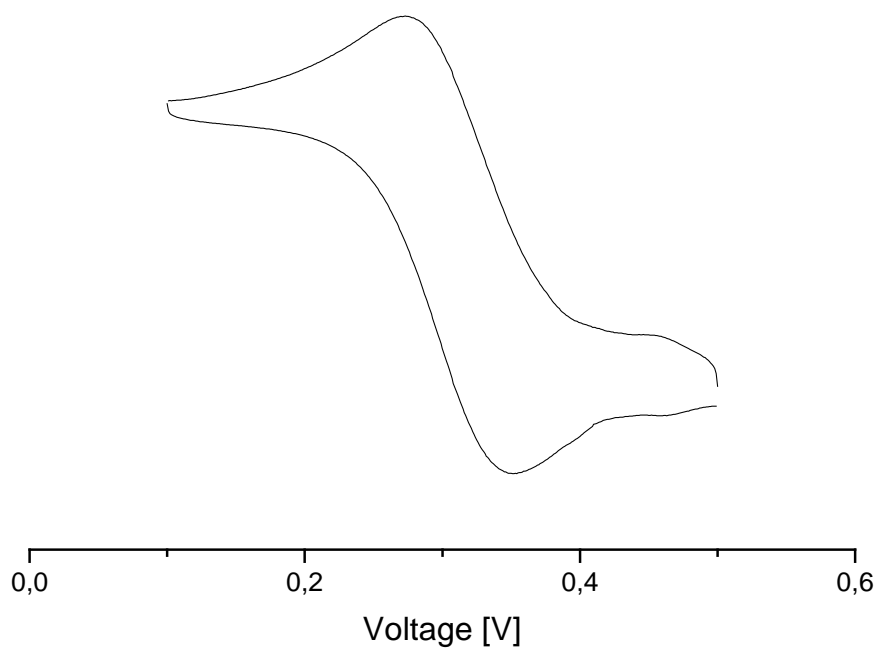

**Figure S13:** Cyclovoltammogramm of  $[\text{Fe}(\text{L}^{\text{OH}})(\text{Cl})]\text{Cl}$  in acetonitrile with 0.1M  $(\text{Bu}_4\text{N})\text{PF}_6$  as supporting electrolyte vs.  $\text{Ag}/\text{AgNO}_3$

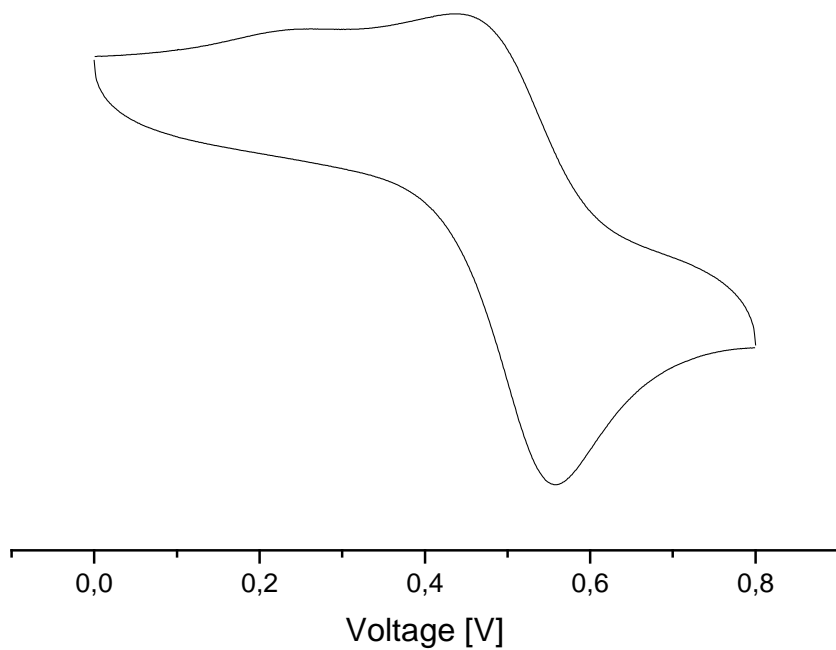

**Figure S14:** Cyclovoltammogramm of  $[\text{Fe}(\text{L}^{\text{OH}})(\text{Cl})]\text{Cl}$  in water with 3M NaCl as supporting electrolyte vs. Ag/AgCl

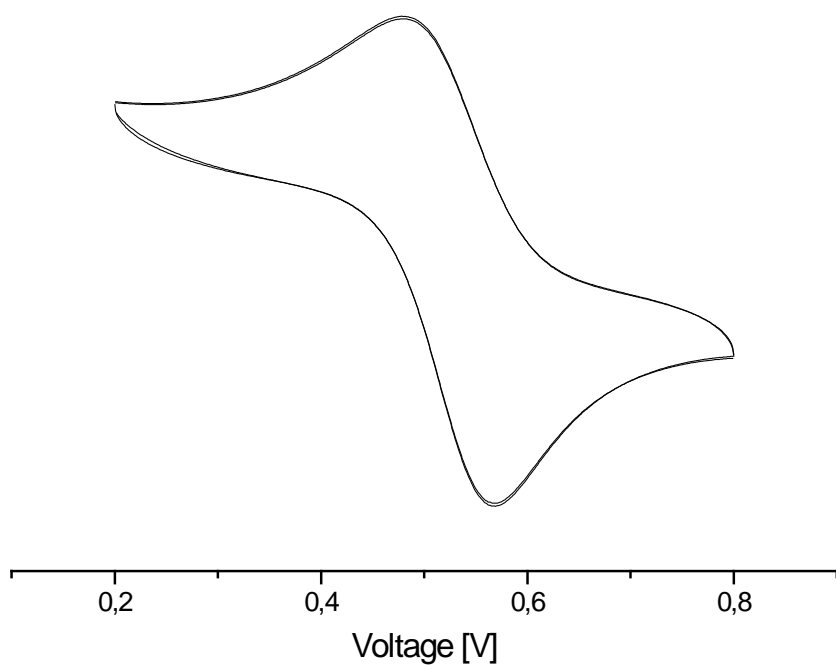

**Figure S15:** Cyclovoltammogramm of  $[\text{Fe}(\text{L})(\text{OHMe})](\text{BF}_4)_2$  in water with 3M NaCl as supporting electrolyte vs. Ag/AgCl



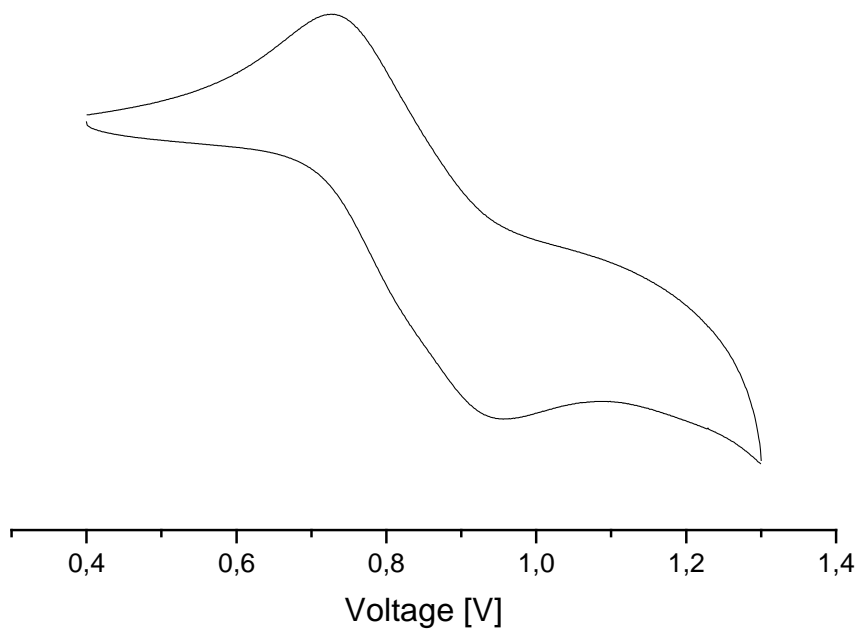

**Figure S16:** Cyclovoltammogramm of  $[\text{Mn}(\text{L})(\text{Cl})]_2[\text{MnCl}_4]$  in acetonitrile with 0.1M  $(\text{Bu}_4\text{N})\text{PF}_6$  as supporting electrolyte vs.  $\text{Ag}/\text{AgNO}_3$
